# Supplementary material
Source: PubMed Central journal article supplement (PMC3536278)
Supplement: EC.00268-12_zek999093997so2.pdf [file EC.00268-12_zek999093997so2.pdf]

1 **Supplemental Table 1.** Oligonucleotide primers used in this study.

2 All primer sequences are written in 5' to 3' direction.

| Name    | Sequence                                                           |
|---------|--------------------------------------------------------------------|
| qRT-F   | GAGCCTGAGTACGCCAAGTC                                               |
| qRT-R   | AATATCGTGCTTGGGAGTGG                                               |
| RACK1-F | GTCATCCACTGCCTGTGCTT                                               |
| RACK1-R | CCTTCTTGCTGGTGTGTTG                                                |
| DGTT1-F | AGTCCCACGGAGGCTGAG                                                 |
| DGTT1-R | ACACCCTTGCCGTACTIONTGTGTC                                          |
| 4DF     | ATGAGCAGCAAATATCAGATCTTACATCTACACAAAATAAGTGAA<br>GCTTGATATCGAAT    |
| 4DR     | TTATTGAGTAAAACCTGGTGGTGTCTTTTGTGCTGCGTTGAAGATACGA<br>CTCACTATAGGGC |
| KMF     | TGAAGCTTGATATCGAATCGGATCCCCGGGTAAATTA                              |
| KMR     | TACGACTCACTATAGGGCGAATTCGAGCTCGTTTAAAC                             |
| 3DF     | ATGAAGGAAACGGCGCAGGAATAACAAGGTGTCTGCTGTAATATGAA<br>GCTTGATATCGAAT  |
| 3DR     | CTACCTACTCCGTCTTGCTCTTATTATGTCGTCTAATTTAAATACGAC<br>TCACTATAGGGC   |
| 595F    | TATCCATATGACGTTCCAGATTACGCTGCTCAGTGCGGCCGCATGGG<br>TTGCGGAGCGAGC   |
| 595R    | GAATTTGACGGTATCGGGGGGATCCACTAGTTCTAGCTAGACTAAC<br>CGACCTCCTGCTT    |
| LICF    | AAAGAGGCGCGTATGGGTTGCGGAGCGAGC                                     |
| LICR    | CGGAAGGCGCGTTACGCTGCCGGCGGCGG                                      |
| P1      | CTAGTAAGAGCCTCCTCATTGGGATATCTCGCTGATCGGCAC                         |
| P2      | CATGGGGGTGGTGGTGTGATCAGCGCTATATCTTAATGAGGAGGCTCTT<br>G             |
| M1      | CTAGCAAGAGCCTCCTCATTAAAGATATAGCGCTGATCACCACCACC                    |
| M2      | CCCATGGTGCCGATCAGCGAGATATCCCAATGAGGAGGCTCTTA                       |

3

4 N represents a random nucleotide.

5

6 **Supplemental Table 2.** Putative lipase-encoding genes selected for expression in yeast.

| Name        | Protein ID in JGI <i>Chlamydomonas</i> 4.0 database | Reason for selection and reference                 | Result                                                                                                                                             |
|-------------|-----------------------------------------------------|----------------------------------------------------|----------------------------------------------------------------------------------------------------------------------------------------------------|
| <i>LIP1</i> | 184308/519543                                       | Down-regulation under nitrogen (N) deprivation (1) | 519543 was the right model according to sequencing of the coding sequence amplified by PCR. This gene complemented the lipase null mutant of yeast |
| <i>LIP2</i> | 191373                                              | Up-regulation under N deprivation (1)              | Not expressed (data not shown)                                                                                                                     |
| <i>LIP3</i> | 160378                                              | Found in lipid droplet proteomics (2)              | No major effect on growth and TAG content                                                                                                          |
| <i>LIP4</i> | 319684                                              | Down-regulation under N deprivation (1)            | Not cloned (data not shown)                                                                                                                        |
| <i>LIP5</i> | 141065                                              | Down-regulation under N deprivation (1)            | No major effect on growth and TAG content                                                                                                          |
| <i>LIP6</i> | 148864                                              | Up-regulation under N deprivation (1)              | No major effect on growth and TAG content                                                                                                          |
| <i>LIP7</i> | 157360                                              | Up-regulation under N deprivation (1)              | Not expressed                                                                                                                                      |
| <i>LIP8</i> | 344422                                              | Up-regulation under N deprivation (1)              | No major effect on growth and TAG content                                                                                                          |

7 **REFERENCES**

8 1. **Miller, R., G. Wu, R. R. Deshpande, A. Vieler, K. Gärtner, X. Li, E. R. Moellering,**  
9 **S. Zäuner, A. J. Cornish, B. Liu, B. Bullard, B. B. Sears, M. H. Kuo, E. L. Hegg, Y.**  
10 **Shachar-Hill, S. H. Shiu, and C. Benning.** 2010. Changes in transcript abundance in  
11 *Chlamydomonas reinhardtii* following nitrogen deprivation predict diversion of  
12 metabolism. *Plant Physiol* **154**:1737-1752

13 2. **Moellering, E. R. and C. Benning.** 2010. RNA interference silencing of a major lipid  
14 droplet protein affects lipid droplet size in *Chlamydomonas reinhardtii*. *Eukaryot. Cell*  
15 **9**:97-106

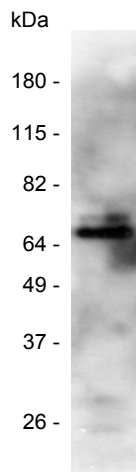

**Supplemental FIGURE 1.** Western blotting for hexahistidine-tagged CrLIP1 protein purified from *E. coli* cells.

Two  $\mu\text{g}$  purified protein was loaded for immunodetection. Note the doublets of CrLIP1 isoforms. The molecular reason is unknown.

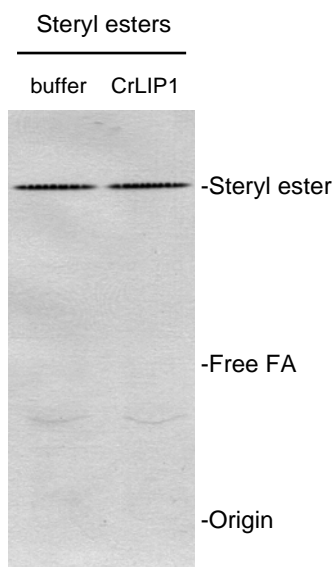

**Supplemental FIGURE 2.** Recombinant CrLIP1 fails to degrade steryl esters *in vitro*.

Thin-layer chromatography resolution of lipids extracted from lipase assay mixtures with radioactive steryl esters derived from yeast cells as the substrate. TLC was developed in petroleum ether-diethyl ether-H<sub>2</sub>O (80:20:1 in volume). An autoradiograph is shown. The position of free fatty acids was marked by running oleic acids in the TLC and aligning the film to the TLC plate. Appearance of radioactive free fatty acids is considered as evidence for esterase activity on steryl esters.

```

HsDAGLα  NMTAVDIVYTSCHDAVYETPFYVAVDHDKKKVVISIRGTLSPKDALTDLTGDAERLPVEG 421
HsDAGLβ  GLQYRDFIHVSFHDKVYELPFLVALDHRKESVAVRGTMSLQDVLTDLSAESEVLDVEC 397
CrLIP1   TLKVEDVAYFRAASKLGGQPAVAVVADRERELILVIVRGTANMKDVLTDLAGAAR----- 216
          :  * . :      . : : .. * . * : : : : : : : : : : : : : : : : : : : : : : : : : : : :
          :  * . :      . : : .. * . * : : : : : : : : : : : : : : : : : : : : : : : : : : : :

HsDAGLα  HHGTWLGHKGMVLSAEYIKKKLEQEMVLSQAFGRDLGRGTKHYGLIVVGHSLGAGTAAIL 481
HsDAGLβ  EVQDRLAHKGISQAARYVYQRLINDGILSQAFSIAP-----EYRLVIVGHSLGGGAAALL 452
CrLIP1   EWEGGYAHESVSLGARKVFDEIKEYVLNLKAQNP-----SFAVRCVGHSLGGGTAGCL 269
          .      . * : : : . * . : : : : : : : : : : : : : : : : : : : : : : : : : : : :
          :      : : : : : : : : : : : : : : : : : : : : : : : : : : : :

HsDAGLα  SFLLR-PQYPTLKCFAYSPPGG-----LLEDAMEYSKEFVTAVVLG 522
HsDAGLβ  ATMLR-AAYPQVRCYAFSPRG-----LWSKALQEYSQSFIVSLVLG 493
CrLIP1   SILMHDEEFAARIYGGVPMGPKKSKGSYMITAVGFGSAACINKELVEEAHPYCTTIVHD 329
          : : : :      : : . * *      . : * : : : : : : * .

HsDAGLα  KDLVPRIGLSQLEGF 537
HsDAGLβ  KDVIPRLSVTNLEDL 508
CrLIP1   ADLVPRLCTDNISDF 344
          * : : * : :      : : : : :

```

**Supplemental Figure 3.** CrLIP1 shares sequence similarity to two human DAG lipases DAGLα and DAGLβ.

Shown are Clustal W2 results using the lipase domains of each of the three proteins. The "GXSXG" hydrolase motif is boxed. Part of the sequence for each protein was used as indicated by the residue numbers on the right side. Asterisk (\*), colon (:), and period (.) denote conserved residues, conservative substitutions and semiconservative substitutions respectively.

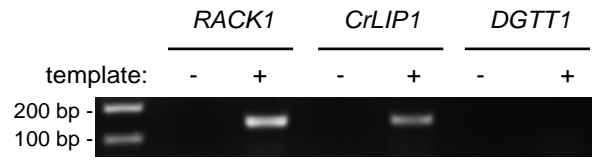

**Supplemental FIGURE 4.** RT-PCR quantitative comparison of *RACK1*, *CrLIP1* and *DGTT1* transcripts in vegetatively growing cells.

No template control was performed for each gene. Calculated sizes for PCR products are: 139 bp for *RACK1*, 138 bp for *CrLIP1* and 98 bp for *DGTT1*.
